# Supplementary material for: Intergenerational Associations Between Mothers’ Adverse Childhood Experiences and their Children’s Cognitive and Socioemotional Outcomes
Source: Research Square preprint supplement (doi:10.21203/rs.3.rs-8714200/v1), 2026-02-05
Supplement: Supplementary file 1 [file f0ab66b9b2845d5b7dc90d92.docx]

Supplemental Files

**Table S1.** Descriptive data on ACEs

|  |  | 24 months, n (%) | | | 54 months, n (%) | | |
| --- | --- | --- | --- | --- | --- | --- | --- |
|  |  | Yes | No | Missing | Yes | No | Missing |
| **Abuse** | Verbal Abuse | 89 (11%) | 681 (88%) | 7 (1%) | 124 (11%) | 998 (88%) | 9 (1%) |
| Physical Abuse | 45 (6%) | 725 (93%) | 7 (1%) | 62 (5%) | 1060 (94%) | 9 (1%) |
| Sexual Abuse | 38 (5%) | 734 (94%) | 5 (<1%) | 62 (5%) | 1062 (94%) | 7 (1%) |
| Domestic Violence towards mother | 28 (4%) | 741 (95%) | 8 (1%) | 46 (4%) | 1074 (95%) | 11 (1%) |
| **Household Dysfunction** | Parent Separation/Divorce | 183 (24%) | 589 (76%) | 5 (<1%) | 278 (25%) | 845 (75%) | 8 (1%) |
| Household member with substance abuse | 103 (13%) | 670 (86%) | 4 (<1%) | 136 (12%) | 986 (87%) | 9 (1%) |
| Household member with mental health problems, suicidality | 153 (20%) | 621 (80%) | 3 (<1%) | 209 (18%) | 914 (81%) | 8 (2%) |
| Household member incarcerated | 7 (1%) | 766 (99%) | 4 (<1%) | 15 (1%) | 1107 (98%) | 9 (1%) |

**Table S2.** Descriptive data on child outcomes at 24 months.

| ASQ-3 domain continuous scores | mean (SD) |
| --- | --- |
| Communication | 55.13 (9.77) |
| Gross Motor | 52.63 (9.14) |
| Fine Motor | 51.75 (10.27) |
| Problem Solving | 52.87 (9.09) |
| Personal-Social Skills | 50.29 (9.11) |
| ASQ-3 domain cutoff scores | N (%) |
| Communication |  |
| - Typical Developing | 657 (84%) |
| - Monitoring Zone | 21 (3%) |
| - Below Cutoff | 23 (3%) |
| - Missing | 76 (10%) |
| Fine Motor |  |
| - Typical Developing | 612 (79%) |
| - Monitoring Zone | 78 (10%) |
| - Below Cutoff | 3 (<1%) |
| - Missing | 84 (11%) |
| Gross Motor |  |
| - Typical Developing | 613 (79%) |
| - Monitoring Zone | 78 (10%) |
| - Below Cutoff | 10 (1%) |
| - Missing | 76 (10%) |
| Problem Solving |  |
| - Typical Developing | 650 (84%) |
| - Monitoring Zone | 32 (4%) |
| - Below Cutoff | 14 (2%) |
| - Missing | 81 (10%) |
| Social-Personal |  |
| - Typical Developing | 592 (76%) |
| - Monitoring Zone | 86 (11%) |
| - Below Cutoff | 15 (2%) |
| - Missing | 84 (11%) |
| MCHAT-R cutoff scores | |
| - Typically developing | 655 (84%) |
| - Monitoring zone | 11 (1%) |
| - Below cutoff | 2 (<1%) |
| - Missing | 109 (14%) |

*Note*. Children ranged in age at assessment (22 – 30 months), 24 month or 27 month norms were applied as appropriate.

**Table S3.** Descriptive data on child outcomes at 54 months.

|  | Mean (SD) |
| --- | --- |
| NIH Toolbox Early Childhood Cognition Battery  (N=638) | |
| Vocabulary | 108.51 (15.17) |
| Flanker | 108.27 (11.19) |
| Dimensional Change Card Sort | 104.61 (12.52) |
| Picture Sequency Memory | 116.15 (22.52) |
| Cognitive Composite | 114.93 (15.21) |
| NIH Toolbox Emotion Summary Scores  (N=925) | |
| Anxiety | 57.59 (10.63) |
| Negatively Psychosocial | 55.41 (9.15) |
| Well-Being | 45.95 (9.43) |

**Table S4.** Bivariate correlations between ACEs and child development outcomes at 24 months.

|  | 1 | 2 | 3 | 4 | 5 | 6 | 7 | 8 | 9 |
| --- | --- | --- | --- | --- | --- | --- | --- | --- | --- |
| 1. Overall ACEs |  | .75 | .84 | -.001 | -.09 | -.02 | -.04 | -.04 | -.001 |
| 1. Abuse |  |  | .28 | -.04 | -.11 | -.001 | -.03 | -.07 | .05 |
| 1. HD |  |  |  | .02 | -.05 | -.03 | -.03 | -.05 | -.03 |
| 1. Communication (ASQ-3) |  |  |  |  | .17 | .22 | .41 | .50 | -.39 |
| 1. Fine Motor (ASQ-3) |  |  |  |  |  | .29 | .31 | .32 | -.19 |
| 1. Gross Motor (ASQ-3) |  |  |  |  |  |  | .25 | .28 | -.09 |
| 1. Problem Solving (ASQ-3) |  |  |  |  |  |  |  | .38 | -.25 |
| 1. Personal-Social Skills (ASQ-3) |  |  |  |  |  |  |  |  | -.31 |
| 1. MCHAT-R |  |  |  |  |  |  |  |  |  |

bolded values = *p* < .001

**Table S5.** Bivariate correlations between ACEs and child development outcomes at 54 months.

|  | 1 | 2 | 3 | 4 | 5 | 6 | 7 | 8 | 9 | 10 | 11 |
| --- | --- | --- | --- | --- | --- | --- | --- | --- | --- | --- | --- |
| 1. Overall ACEs |  | .76 | .85 | -.001 | -.11 | -.01 | -.02 | -.04 | .001 | .05 | -.07 |
| 1. Abuse |  |  | .31 | -.04 | -.09 | -.02 | -.05 | -.06 | .001 | .001 | -.06 |
| 1. HD |  |  |  | .05 | -.08 | -.001 | -.001 | -.001 | -.001 | .07 | -.06 |
| 1. Vocabulary |  |  |  |  | .28 | .21 | .26 | .62 | .05 | -.02 | .02 |
| 1. Flanker |  |  |  |  |  | .33 | .27 | .60 | .01 | -.05 | .02 |
| 1. DCCS |  |  |  |  |  |  | .11 | .52 | .01 | .07 | -.05 |
| 1. Picture Sequence |  |  |  |  |  |  |  | .78 | -.01 | .001 | .02 |
| 1. Cognition Composite |  |  |  |  |  |  |  |  | .03 | .03 | -.001 |
| 1. Anxiety |  |  |  |  |  |  |  |  |  | .35 | -.31 |
| 1. Negative Psychosocial Functioning |  |  |  |  |  |  |  |  |  |  | -.60 |
| 1. Psychological Well-Being |  |  |  |  |  |  |  |  |  |  |  |

bolded values = *p* < .001

**Note:** Tables S6-S13 include parent divorce/separation item on model 1 ACEs and model 2 household dysfunction factor.

**Table S6.** Fit statistics for the one- and two-factor models with divorce item

|  | **χ2** | **df** | **χ2/df** | **RMSEA [90% CI]** | **SRMR** | **GFI** | **CFI** | **TLI** |
| --- | --- | --- | --- | --- | --- | --- | --- | --- |
| **Children 24mo (8-items)** | | | | | | | | |
| Model 1 | 56.13*** | 20 | 2.81 | .04 [.03, .05] | .11 | .99 | .97 | .96 |
| Model 2 | 23.98*** | 19 | 1.43 | .02 [.00, .04] | .08 | .99 | .99 | .99 |
| **Children 54 mo (8-items)** | | | | | | | | |
| Model 1 | 56.13*** | 20 | 2.81 | .04 [.03, .05] | .11 | .99 | .97 | .96 |
| Model 2 | 27.21*** | 19 | 1.43 | .02 [.00, .04] | .08 | .99 | .99 | .99 |

*Note*. Recommended cut-offs: chi-square ratio ≤ 3 is acceptable (Schermelleh-Engel et al., 2003), a Root Mean Square Error of Approximation (RMSEA) ≤ .06 is considered acceptable. A Standardized Root-Mean-Square Residual (SRMR) ≤ .08 indicates acceptable model fit (Brown, 2015). A Goodness of Fit (GFI) Comparative Fit Index (CFI) and Tucker-Lewis Index (TLI) ≥ .90 are considered acceptable, ideally ≥ .95, *** =p <.001.

**Table S7.** Standardized factor loadings (and standard errors) for the one- and two-factor models (8-items)

|  | **Children at 24mo** | | | **Children at 54mo** | | |
| --- | --- | --- | --- | --- | --- | --- |
|  | **Model 1** | **Model 2** | | **Model 1** | **Model 2** | |
| **ACE item** | **Overall Adversity** | **Abuse** | **HD** | **Overall Adversity** | **Abuse** | **HD** |
| Did a parent or other adult in the household often or very often…Swear at you, insult you, put you down, or humiliate you? Or act in a way that made you afraid that you might be physically hurt? | .84 (.04) | .89 (.05) |  | .84 (.04) | .88 (.04) |  |
| Did a parent or other adult in the household often or very often...Push, grab, slap, or throw something at you? Or ever hit you so hard that you had marks or were injured? | .87 (.05) | .89 (.05) |  | .84 (.05) | .87 (.05) |  |
| Did an adult or person at least 5 years older than you ever...Touch or fondle you or have you touch their body in a sexual way? Or attempt or actually have oral, anal, or vaginal intercourse with you? | .56 (.08) | .60 (.09) |  | .47 (.08) | .49 (.08) |  |
| Was your mother or stepmother: Often or very often pushed, grabbed, slapped, or had something thrown at her? Or sometimes, often, or very often kicked, bitten, hit with a fist, or hit with something hard? Or ever repeatedly hit at least a few minutes or threatened with a gun or knife? | .73 (.07) | .77 (.07) |  | .74 (.05) | .77 (.06) |  |
| Were your parents ever separated or divorced? | .31 (.06) |  | .38 (.07) | .42 (.05) |  | .47 (.04) |
| Did you live with anyone who was a problem drinker or alcoholic or who used street drugs? | .55 (.06) |  | .66 (.07) | .59 (.05) |  | .70 (.05) |
| Was a household member depressed or mentally ill, or did a household member attempt suicide? | .65 (.05) |  | .74 (.07) | .55(.05) |  | .64 (.04) |
| Did a household member go to prison? | .95 (.09) |  | .95 (.10) | .78 (.09) |  | .89 (.10) |

*Note*. Model 1—One-factor model. Model 2—Two-factor model. All factor loadings were significant at *p* < .001. In the one factor model at 24 months, the resulting reliability estimate using Raykov’s formula demonstrated good internal consistency, ρ =.88 [95% CI .87, .90]. In the two-factor model, internal consistency was excellent, ρ = .95 [0.94, 0.96] for abuse and .91 [0.89, 0.93] for household dysfunction. For the 54 mo sample, reliability estimates were similarly good for the ACEs model ρ = .87 [0.85, 0.88], and excellent for the two-factor model for abuse ρ = .94 [0.93, 0.95] and household dysfunction ρ = .91, [0.89, 0.92].

**Table S8.** Associations between maternal ACEs with neurodevelopment as continuous scores using the ASQ-3 at 24 months.

|  | **ASQ-3 Domains** | **Unadjusted Models** | | | | **Adjusted Models** | | | |
| --- | --- | --- | --- | --- | --- | --- | --- | --- | --- |
|  |  | B [95% CI] | β | SE | p | B [95% CI] | β | SE | p |
| **Overall ACEs** | Communication | -0.35 [-1.34, 0.65] | -0.04 | 0.51 | .50 | 0.11 [-0.77, 1.00] | 0.01 | 0.45 | .80 |
| Fine Motor | -1.38 [-2.53, -0.22] | -0.13 | 0.59 | .02* | -1.21 [-2.31,-0.12] | -0.12 | 0.56 | .03* |
| Gross Motor | -0.28 [-1.12, 0.55] | -0.03 | 0.43 | .51 | -0.29 [-1.15, 0.57] | -0.03 | 0.44 | .51 |
| Problem Solving | -0.48 [-1.47, 0.51] | -0.05 | 0.51 | .34 | -0.36 [-1.29, 0.57] | -0.04 | 0.48 | .45 |
| Personal Social Skills | -0.74 [-1.63, 0.15] | -0.08 | 0.46 | .11 | -0.38 [-1.22, 0.47] | -0.04 | 0.43 | .38 |
| **Abuse** | Communication | -0.51 [-1.52, 0.5] | -0.05 | 0.51 | .32 | -0.09 [-0.99, 0.80] | -0.01 | 0.46 | .84 |
| Fine Motor | -1.28 [-2.43, -0.13] | -0.13 | 0.59 | .03* | -1.21 [-2.32,-0.10] | -0.13 | 0.57 | .03* |
| Gross Motor | -0.23 [-1.02, 0.55] | -0.03 | 0.4 | .56 | -0.22 [-1.03, 0.58] | -0.02 | 0.41 | .59 |
| Problem Solving | -0.48 [-1.5, 0.53] | -0.05 | 0.52 | .35 | -0.41 [-1.39, 0.57] | -0.04 | 0.50 | .41 |
| Personal Social Skills | -0.89 [-1.8, 0.02] | -0.10 | 0.47 | .06 | -0.57 [-1.45, 0.32] | -0.06 | 0.45 | .21 |
| **Household Dysfunction** | Communication | 0.44 [-0.52, 1.41] | 0.05 | 0.49 | .37 | 0.77 [-0.2, 1.74] | 0.08 | 0.49 | .12 |
| Fine Motor | -1.03 [-2.22, 0.17] | -0.10 | 0.61 | .09 | -0.72 [-1.89, 0.44] | -0.07 | 0.06 | .23 |
| Gross Motor | -0.23 [-1.24, 0.77] | -0.03 | 0.51 | .65 | -0.36 [-1.44, 0.72] | -0.04 | 0.55 | .51 |
| Problem Solving | -0.47 [-1.41, 0.47] | -0.05 | 0.48 | .33 | -0.28 [-1.24, 0.67] | -0.03 | 0.56 | .56 |
| Personal Social Skills | 0.14 [-0.75, 1.03] | 0.02 | 0.45 | .76 | 0.38 [-0.51, 1.28] | 0.04 | 0.46 | .40 |

*Note.* Regression results were derived from the one-factor model (“Overall ACEs”; Model 1) and two-factor model (“Abuse” and “Household Dysfunction”; Model 2). **p* < .05

**Table S9.** Associations between maternal ACES, abuse, and household dysfunction with neurodevelopmental risk as cut-off score using MCHAT-R at 24 months.

|  | **Unadjusted Models** | | **Adjusted Models** | |
| --- | --- | --- | --- | --- |
| Autism risk by: | OR [95% CI] | p | OR [95% CI] | p |
| **Overall ACEs** | 1.01 (0.99 to 1.03) | .24 | 1.01 (0.99 to 1.03) | .44 |
| **Abuse** | 1.01 (0.99 to 1.04) | .18 | 1.01 (0.99 to 1.03) | .33 |
| **Household Dysfunction** | 0.99 (0.98 to 1.00) | .28 | 0.99 (0.98 to 1.00) | .05 |

**Table S10.** Associations between maternal ACEs, abuse, and household dysfunction with neurocognition using age-corrected standard scores for the NIH Toolbox Cognitive Battery at 54 months.

|  | **Cognitive Domains** | **Unadjusted Models** | | | | **Adjusted Models** | | | |
| --- | --- | --- | --- | --- | --- | --- | --- | --- | --- |
|  |  | B [95% CI] | β | SE | p | B [95% CI] | β | SE | p |
| **Overall ACEs** | Flanker | -1.46 [-2.66, -0.27] | -0.13 | 0.61 | .02* | -1.19 [-2.31, -0.07] | -0.11 | 0.57 | .04* |
| DCCS | -0.22 [-1.34, 0.91] | -0.02 | 0.58 | .71 | -0.07 [-1.16, 1.01] | -0.01 | 0.55 | .90 |
| Picture Sequence Memory | -1.35 [-3.73, 1.04] | -0.06 | 1.22 | .27 | -1.32 [-3.78, 1.14] | -0.06 | 1.26 | .29 |
| Vocabulary | -0.61 [-2.17, 0.96] | -0.04 | 0.8 | .45 | -0.56 [-2.07, 0.94] | -0.04 | 0.77 | .46 |
| Cognitive Composite | -1.23 [-2.99, 0.53] | -0.08 | 0.9 | .17 | -1.01 [-2.74, 0.72] | -0.07 | 0.88 | .25 |
| **Abuse** | Flanker | -1.2 [-2.40, -0.002] | -0.11 | 0.61 | **.**05 | -0.93 [-2.05, 0.18] | -0.08 | 0.57 | .10 |
| DCCS | -0.28 [-1.41, 0.85] | -0.02 | 0.58 | .63 | -0.19 [-1.26, 0.88] | -0.02 | 0.55 | .73 |
| Picture Sequence Memory | -1.45 [-3.97, 1.06] | -0.07 | 1.28 | .26 | -1.31 [-3.87, 1.25] | -0.06 | 1.31 | .32 |
| Vocabulary | -0.92 [-2.47, 0.62] | -0.06 | 0.79 | .24 | -0.69 [-2.17, 0.80] | -0.05 | 0.76 | .36 |
| Cognitive Composite | -1.27 [-3.11, 0.56] | -0.08 | 0.93 | .17 | -0.98 [-2.76, 0.80] | -0.06 | 0.91 | .28 |
| **Household Dysfunction** | Flanker | -1.55 [-2.84, -0.25] | -0.14 | 0.66 | .02* | -1.44 [-2.68, -0.21] | -0.13 | 0.63 | .02* |
| DCCS | -0.04 [-1.34, 1.25] | -0.003 | 0.66 | .95 | 0.15 [-1.18, 1.47] | 0.01 | 0.68 | .83 |
| Picture Sequence Memory | -0.56 [-2.85, 1.73] | -0.03 | 1.17 | .63 | -0.95 [-3.45, 1.56] | -0.04 | 1.28 | .46 |
| Vocabulary | 0.55 [-1.26, 2.36] | 0.04 | 0.92 | .55 | -0.03 [-1.88, 1.82] | 0 | 0.94 | .97 |
| Cognitive Composite | -0.64 [-2.44, 1.16] | -0.04 | 0.92 | .49 | -0.77 [-2.63, 1.09] | -0.05 | 0.95 | .42 |

*Note.* Regression results were derived from the one-factor model (“Overall ACEs”; Model 1) and two-factor model (“Abuse” and “Household Dysfunction”; Model 2). **p* < .05, ** *p* < .01

**Table S11.** Associations between maternal ACEs, abuse, and household dysfunction with socioemotional functioning using age- and sex-corrected standard scores for NIH Toolbox Emotion Battery at 54 months.

|  | **Emotional Domains** | **Unadjusted Models** | | | | **Adjusted Models** | | | |
| --- | --- | --- | --- | --- | --- | --- | --- | --- | --- |
|  |  | B [95% CI] | β | SE | p | B [95% CI] | β | SE | p |
| **Overall ACEs** | Anxiety | 0.16 [-0.70, 1.03] | 0.02 | 0.44 | .71 | 0.23 [-0.67, 1.12] | 0.02 | 0.46 | .62 |
| Negative Psychosocial Functioning | 0.57 [-0.21, 1.34] | 0.06 | 0.39 | .15 | 0.63 [-0.16, 1.41] | 0.07 | 0.4 | .12 |
| Well-Being | -0.99 [-1.79, -0.19] | -0.11 | 0.41 | .02* | -1.01 [-1.79, -0.24] | -0.11 | 0.4 | .01* |
| **Abuse** | Anxiety | 0.16 [-0.68, 1.00] | 0.02 | 0.43 | .71 | 0.18 [-0.68, 1.05] | 0.02 | 0.44 | .68 |
| Negative Psychosocial Functioning | 0.35 [-0.37, 1.07] | 0.04 | 0.37 | .34 | 0.4 [-0.33, 1.14] | 0.04 | 0.38 | .28 |
| Well-Being | -0.93 [-1.66, -0.19] | -0.1 | 0.38 | .01* | -0.98 [-1.72, -0.24] | -0.10 | 0.38 | .01* |
| **Household Dysfunction** | Anxiety | -0.02 [-0.98, 0.94] | -0.002 | 0.49 | .97 | 0.16 [-0.83, 1.15] | 0.02 | 0.51 | .75 |
| Negative Psychosocial Functioning | 1.17 [0.21, 2.13] | 0.13 | 0.49 | .02* | 1.26 [0.28, 2.24] | 0.14 | 0.50 | .01* |
| Well-Being | -0.97 [-1.97, 0.04] | -0.10 | 0.51 | .06 | -0.93 [-1.91, 0.04] | -0.10 | 0.50 | .06 |

*Note.* Regression results were derived from the one-factor model (“Overall ACEs”; Model 1) and two-factor model (“Abuse” and “Household Dysfunction”; Model 2). **p* < .05

**Table S12.** Association between maternal ACEs, abuse, and household dysfunction with neurodevelopmental difficulties (typically-developing versus at-risk based on cut-off) using the ASQ-3.

|  | **ASQ-3 Domains** | **Unadjusted Models** | | **Adjusted Models** | |
| --- | --- | --- | --- | --- | --- |
|  |  | OR [95% CI] | p | OR [95% CI] | p |
| **Overall ACEs** | Communication | 1.01 (0.98 to 1.04) | .48 | 1.00 (0.97 to 1.03) | .97 |
| Fine Motor | 1.05 (1.01 to 1.09) | .01* | 1.05 (1.01 to 1.09) | .02* |
| Gross Motor | 1.00 (0.97 to 1.04) | .80 | 1.01 (0.98 to 1.04) | .59 |
| Problem Solving | 1.02 (0.99 to 1.04) | .26 | 1.01 (0.99 to 1.04) | .28 |
| Personal Social | 1.01 (0.98 to 1.04) | .64 | 1.00 (0.97 to 1.03) | .83 |
| **Abuse** | Communication | 1.01 (0.99 to 1.05) | .23 | 1.01 (0.98 to 1.04) | .54 |
| Fine Motor | 1.05 (1.01 to 1.10) | .01* | 1.05 (1.01 to 1.10) | .01* |
| Gross Motor | 1.00 (0.97 to 1.03) | .95 | 1.00 (0.98 to 1.03) | .81 |
| Problem Solving | 1.02 (0.99 to 1.05) | .17 | 1.02 (0.99 to 1.05) | .16 |
| Personal Social | 1.02 (0.98 to 1.05) | .32 | 1.01 (0.98 to 1.04) | .71 |
| **Household Dysfunction** | Communication | 0.98 (0.96 to 1.00) | .07 | 0.97 (0.95 to 0.99) | .01* |
| Fine Motor | 1.01 (0.97 to 1.05) | .59 | 1.00 (0.97 to 1.04) | .86 |
| Gross Motor | 1.02 (0.98 to 1.05) | .37 | 1.02 (0.98 to 1.06) | .35 |
| Problem Solving | 1.00 (0.97 to 1.02) | .64 | 0.99 (0.97 to 1.01) | .31 |
| Personal Social | 0.96 (0.94 to 0.99) | .002** | 0.96 (0.93 to 0.98) | .001** |

*Note.* Adjusted models control for maternal age, education, race, birth country, household income, fetal sex, gestation age, fetal weight, and age at assessment. **p* < .05, ***p* < .01

**Table S13.** False Discovery Rate (FDR) and Benjamini-HochbergCorrection.

|  | # of tests (k) | Predictor | Benjamini-Hochberg correction | # of q values ≤ .05 | Adjusted p-values |
| --- | --- | --- | --- | --- | --- |
| **Children at 24 mo** | 22 | ACEs | .02 | 0 | > .05 |
| 22 | Abuse | .01 | 0 | > .05 |
| 22 | Household Dysfunction | .01 | 0 | > .05 |
| **Children at 54 mo** | 16 | ACEs | .02 | 0 | > .05 |
| 16 | Abuse | .01 | 0 | > .05 |
| 16 | Household Dysfunction | .02 | 0 | > .05 |

*Note.* False Discovery Rate (FDR; < .05) and Benjamini-HochbergCorrection p = 0.05.

**Table S14.** Association between maternal ACEs and household dysfunction with neurodevelopmental difficulties (typically-developing versus at-risk based on cut-off) using the ASQ-3.

|  |  | **Unadjusted** | | **Adjusted** | |
| --- | --- | --- | --- | --- | --- |
|  |  | OR [95% CI] | p | OR [95% CI] | p |
| **Overall ACEs** | Communication | 1.01 [0.98, 1.04] | .46 | 1.00 [0.97, 1.03] | .98 |
| Fine Motor | 1.05 [1.01, 1.09] | .01* | 1.05 [1.01, 1.09] | .01* |
| Gross Motor | 1.00 [0.97, 1.03] | .85 | 1.01 [0.98, 1.04] | .63 |
| Problem Solving | 1.02 [0.99, 1.04] | .26 | 1.02 [0.99, 1.04] | .28 |
| Personal Social | 1.01 [0.98, 1.04] | .60 | 1.00 [0.97, 1.03] | .87 |
| **Abuse** | Communication | 1.01 [0.99, 1.05] | .23 | 1.01 [0.98, 1.04] | .54 |
| Fine Motor | 1.05 [1.01, 1.10] | .01* | 1.05 [1.01, 1.10] | .01* |
| Gross Motor | 1.00 [0.97, 1.03] | .95 | 1.00 [0.98, 1.03] | .81 |
| Problem Solving | 1.02 [0.99, 1.05] | .17 | 1.02 [0.99, 1.05] | .16 |
| Personal Social | 1.02 [0.98, 1.05] | .32 | 1.01 [0.98, 1.04] | .71 |
| **Household Dysfunction** | Communication | 0.98 [0.96, 1.00] | .02* | 0.97 [0.95, 0.99] | .002** |
| Fine Motor | 1.02 [0.98, 1.06] | .40 | 1.01 [0.97, 1.05] | .60 |
| Gross Motor | 1.01 [0.98, 1.05] | .46 | 1.02 [0.97, 1.06] | .49 |
| Problem Solving | 0.99 [0.97, 1.02] | .49 | 0.99 [0.96, 1.01] | .21 |
| Personal Social | 0.96 [0.94, 0.98] | < .001*** | 0.95 [0.93, 0.98] | < .001*** |

* *p* < .05, ** *p* < .01, *** *p* < .001

**Table S15.** False Discovery Rate (FDR) and Benjamini-HochbergCorrection.

|  | # of tests (k) | Predictor | Benjamini-Hochberg correction | # of q values ≤ .05 | Adjusted p-values |
| --- | --- | --- | --- | --- | --- |
| **Children at 24 months** | 22 | ACEs | .01 | 0 | > .05 |
| 22 | Abuse | .01 | 0 | > .05 |
| 22 | Household Dysfunction | .002 | 0 | > .05 |
| **Children at 54 months** | 16 | ACEs | .01 | 0 | > .05 |
| 16 | Abuse | .01 | 0 | > .05 |
| 16 | Household Dysfunction | .002 | 2 | = .01 |

*Note.* False Discovery Rate (FDR; < .05) and Benjamini-HochbergCorrection p = 0.05.
